# Supplementary material for: A High Efficacy DNA Vaccine Against Tilapia Lake Virus in Nile Tilapia (<em><i>Oreochromis niloticus</i></em>)
Source: Preprints.org preprint supplement (doi:10.20944/preprints202107.0626.v1), 2021-07-28
Supplement: Supplementary file 1 [file supplementary]

**
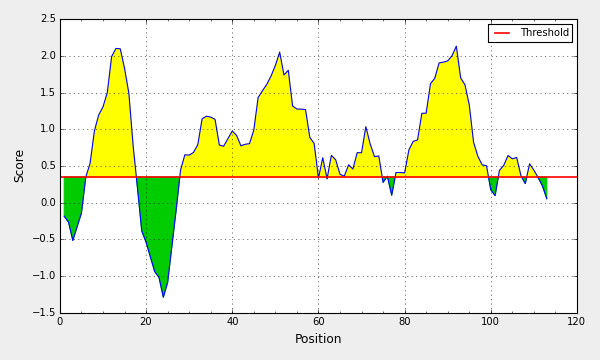
**

TiLV ORF10


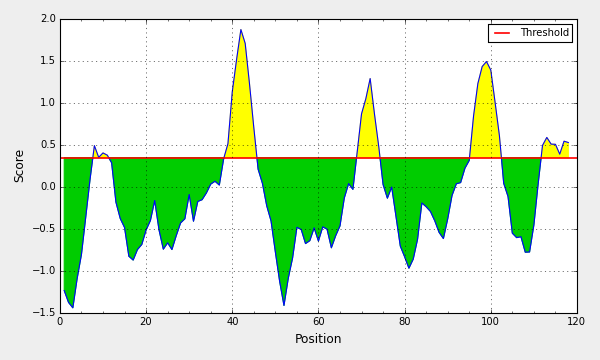


TiLV ORF9

**
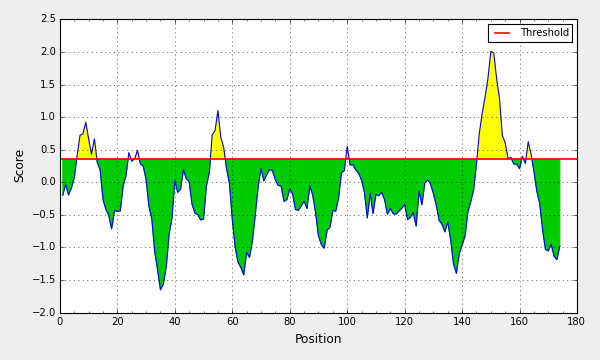
**

TiLV ORF8


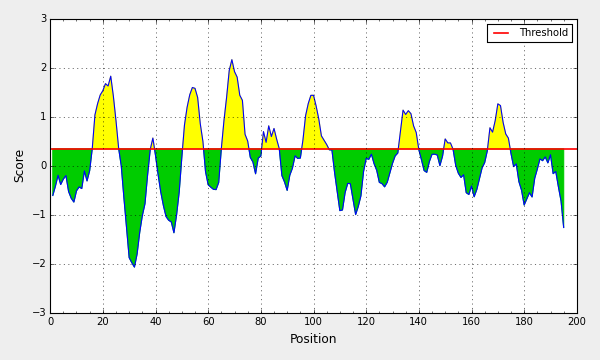


TiLV ORF7


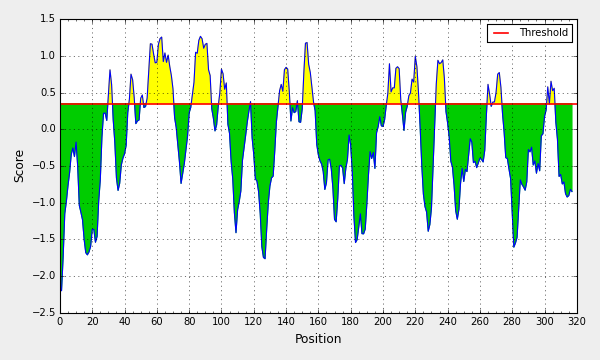


TiLV ORF6


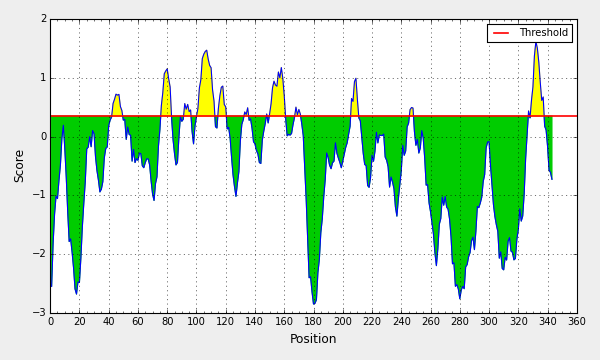


TiLV ORF5


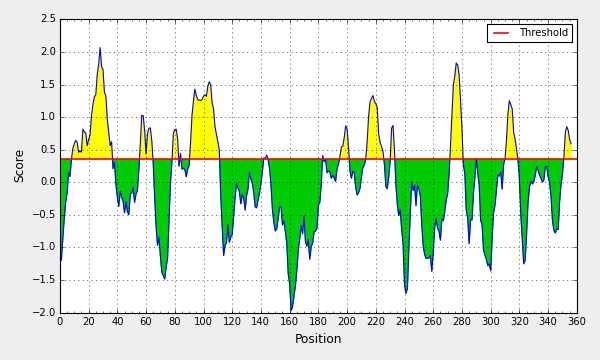


TiLV ORF4


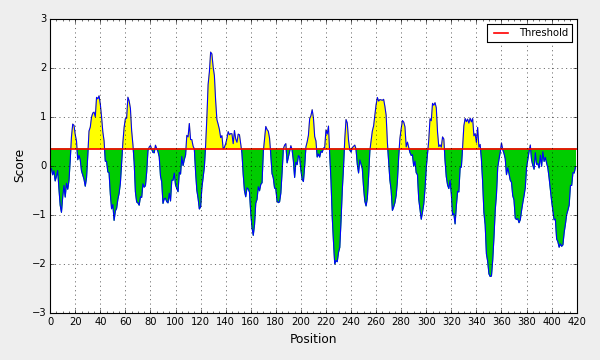


TiLV ORF3


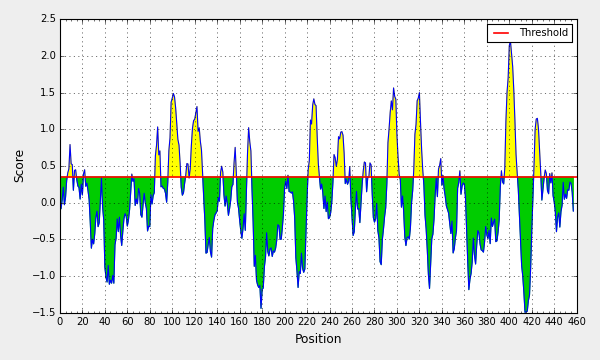


TiLV ORF2


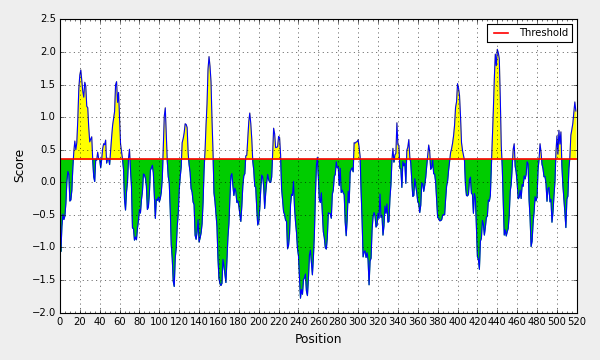


TiLV ORF1

**Supplementary Fig. 1** The antibody epitope prediction of 10 putative proteins encoded by TiLV. The antibody epitope prediction of 10 putative proteins encoded by TiLV segment 1~10 using the Bepipred Linear Epitope Prediction (IEDB analysis resource) at <http://tools.immuneepitope.org/bcell/>.
